# Supplementary material for: Factors Associated with Severe Leptospirosis, Martinique, 2010–2013
Source: PubMed Central journal article supplement (PMC4672444; doi:10.3201/eid2112.141099), 2015-12
Supplement: 14-1099-Techapp-s1.pdf [file 14-1099-Techapp-s1.pdf]

# Severe Leptospirosis in Martinique, 2010–2013

## Technical Appendix

**Technical Appendix Table 1.** Complications in 102 confirmed cases of leptospirosis and their associated leptospiremia in Martinique, 2010-2013

| Complications                                               | Cases, n (%);<br>Leptospiremia, log <sub>10</sub> /ml | Controls, n (%);<br>Leptospiremia, log <sub>10</sub> /ml | P value |
|-------------------------------------------------------------|-------------------------------------------------------|----------------------------------------------------------|---------|
| Icteric leptospirosis                                       | 40 (39%)<br>4.88 (3.91-6.86)                          | 62 (61%)<br>4.13 (3.14-4.90)                             | 0.0035  |
| Acute renal failure                                         | 28 (27%)<br>4.77 (3.55-7.28)                          | 74 (73%)<br>4.25 (3.34-5.09)                             | 0.09    |
| Multi organ failure                                         | 24 (23%)<br>5.55 (4.07-7.49)                          | 78 (77%)<br>4.16 (3.34-4.96)                             | 0.0052  |
| Arterial hypotension                                        | 22 (21%)<br>6.10 (4.55-7.50)                          | 80 (79%)<br>4.13 (3.20-4.93)                             | 0.0002  |
| Internal haemorrhage                                        | 11 (11%)<br>7.50 (3.88-7.82)                          | 91 (89%)<br>4.29 (3.34-5.09)                             | 0.0023  |
| Shock treated with vasoactive drugs *                       | 9 (9%)<br>7.49 (7.15-7.80)                            | 93 (91%)<br>4.21 (3.27-5.05)                             | <0.0001 |
| Respiratory insufficiency requiring mechanical ventilation* | 8 (8%)<br>7.49 (7.28-8)                               | 94 (92%)<br>4.24 (3.27-5.09)                             | <0.0001 |
| Alveolar haemorrhage                                        | 8 (8%)<br>7.53 (7.45-8.01)                            | 94 (92%)<br>4.28 (3.27-5.09)                             | 0.0001  |
| Internal bleeding requiring blood transfusion*              | 8 (8%)<br>7.68 (7.5-8.02)                             | 94 (92%)<br>4.24 (3.27-5.05)                             | <0.0001 |
| Acute renal failure requiring dialysis*                     | 7 (7%)<br>7.56 (7.49-8.21)                            | 95 (93%)<br>4.27 (3.27-5.09)                             | <0.0001 |
| Altered mental status                                       | 4 (4%)<br>7.49 (7.06-7.86)                            | 98 (96%)<br>4.29 (3.34-5.19)                             | 0.002   |

\*Complications that met our clinical definition for severe leptospirosis.

**Technical Appendix Table 2.** Genomic identification based on 16S rRNA sequencing of PCR products, and the relative leptospiremia in confirmed cases of leptospirosis in Martinique, 2010-2013

| Species                  | All cases, N=102 | Cases with severe disease, N=12, no (%) | Leptospiremia, log <sub>10</sub> /ml, median (p25-p75) |
|--------------------------|------------------|-----------------------------------------|--------------------------------------------------------|
| <i>L. interrogans</i> *  | 23               | 11 (48)                                 | 6.35 (4.35-7.50)                                       |
| <i>L. santarosai</i>     | 22               | 0                                       | 4.39 (3.62-4.94)                                       |
| <i>L. borgpetersenii</i> | 18               | 1(6)                                    | 4.11 (2.85-5.21)                                       |
| <i>L. kirschneri</i>     | 15               | 0                                       | 4.81 (3.90-5.58)                                       |
| <i>L. kmetyi</i>         | 4                | 0                                       | 3.26 (2.41-4.02)                                       |
| <i>L. noguchii</i>       | 3                | 0                                       | 4.21 (3.27-5.13)                                       |
| Unidentified**           | 17               | 0                                       | 2.69 (2.34-3.88)                                       |

\*Compared with other species, *L. interrogans* was associated with highest level of leptospiremia (P=0.0001).

\*\* Leptospiremia of specimens without species identification was significantly lower (P=0.0001).

**Technical Appendix Table 3.** Serogroup and genomic identification in confirmed 102 cases of leptospirosis in Martinique, 2010-2013

| Severity | Presumptive serogroup (serum) [a] | blood culture [b] | Serogroup (culture) [c] | blood DNA [b] | species (rrs)            | genotype [d] | MLVA [e]    | Presumptive serogroup/serovar [f] |
|----------|-----------------------------------|-------------------|-------------------------|---------------|--------------------------|--------------|-------------|-----------------------------------|
| 1        | Icterohaemorrhagiae               |                   |                         | +             | <i>L. interrogans</i>    | no sequence  | 500/350/750 | Ictero / Ictero                   |
| 1        | Icterohaemorrhagiae               |                   |                         | +             | <i>L. interrogans</i>    | A            | 500/350/750 | Ictero / Ictero                   |
| 1        | Icterohaemorrhagiae               |                   |                         | +             | <i>L. interrogans</i>    | A            | 500/350/750 | Ictero / Ictero                   |
| 1        | unknown (titer<400)               |                   |                         | +             | <i>L. interrogans</i>    | A            | 500/350/750 | Ictero / Ictero                   |
| 1        | Icterohaemorrhagiae               |                   |                         | +             | <i>L. interrogans</i>    | A            | 500/350/750 | Ictero / Ictero                   |
| 1        | ND                                |                   |                         | +             | <i>L. interrogans</i>    | A            | 500/350/750 | Ictero / Ictero                   |
| 1        | Icterohaemorrhagiae               | +                 | Ictero                  | +             | <i>L. interrogans</i>    | A            | 500/350/750 | Ictero / Ictero                   |
| 1        | unknown (co-agglutination)        |                   |                         | +             | <i>L. interrogans</i>    | A            | 500/350/750 | Ictero / Ictero                   |
| 1        | Icterohaemorrhagiae               | +                 | Ictero                  | +             | <i>L. interrogans</i>    | A            | 500/350/750 | Ictero / Ictero                   |
| 1        | Icterohaemorrhagiae               |                   |                         | +             | <i>L. interrogans</i>    | A            | 500/350/750 | Ictero / Ictero                   |
| 1        | Tarassovi                         | +                 | Tarassovi               | +             | <i>L. borgpetersenii</i> | no sequence  | ND          | Tarassovi / unknown               |
| 0        | unknown (co-agglutination)        |                   |                         | +             | <i>L. kirschneri</i>     | no sequence  | ND          | unknown / unknown                 |
| 0        | Icterohaemorrhagiae               |                   |                         | +             | <i>L. kirschneri</i>     | no sequence  | ND          | Ictero / Bogvere                  |
| 0        | Ballum                            |                   |                         | +             | <i>L. borgpetersenii</i> | no sequence  | ND          | Ballum / Arborea                  |
| 0        | Icterohaemorrhagiae               |                   |                         | +             | <i>L. kirschneri</i>     | no sequence  | ND          | Ictero / Bogvere                  |
| 0        | Icterohaemorrhagiae               | +                 | Celledoni               | +             | <i>L. santarosai</i>     | I            | ND          | Celledoni / unknown               |
| 0        | unknown (titer<400)               | +                 | Tarassovi               | +             | <i>L. santarosai</i>     | L            | ND          | Tarassovi / unknown               |
| 0        | Ballum                            |                   |                         | +             | <i>L. borgpetersenii</i> | no sequence  | ND          | Ballum / Arborea                  |
| 0        | Icterohaemorrhagiae               |                   |                         | +             | <i>L. borgpetersenii</i> | no sequence  | ND          | unknown / unknown                 |
| 0        | Celledoni                         |                   |                         | +             | no sequence              | no sequence  | ND          | Celledoni / unknown               |
| 0        | unknown (titer<400)               |                   |                         | +             | <i>L. santarosai</i>     | no sequence  | ND          | unknown / unknown                 |
| 0        | unknown (titer<400)               |                   |                         | +             | <i>L. santarosai</i>     | no sequence  | ND          | unknown / unknown                 |
| 0        | Celledoni                         | +                 | unknown                 | +             | <i>L. santarosai</i>     | H            | ND          | unknown / unknown                 |
| 0        | Icterohaemorrhagiae               |                   |                         | +             | no sequence              | no sequence  | ND          | Ictero / unknown                  |
| 0        | Icterohaemorrhagiae               | +                 | Ictero                  | +             | <i>L. interrogans</i>    | A            | 500/350/750 | Ictero / Ictero                   |
| 0        | Grippotyphosa                     |                   |                         | +             | <i>L. interrogans</i>    | no sequence  | ND          | unknown / unknown                 |
| 0        | Icterohaemorrhagiae               |                   |                         | +             | <i>L. interrogans</i>    | A            | 500/350/750 | Ictero / Ictero                   |
| 0        | ND                                |                   |                         | +             | <i>L. kmetyi</i>         | M            | ND          | unknown / unknown                 |
| 0        | ND                                |                   |                         | +             | no sequence              | no sequence  | ND          | unknown / unknown                 |
| 0        | unknown (titer<400)               |                   |                         | +             | <i>L. kmetyi</i>         | no sequence  | ND          | unknown / unknown                 |
| 0        | Icterohaemorrhagiae               |                   |                         | +             | <i>L. borgpetersenii</i> | C            | ND          | Ballum / Arborea                  |
| 0        | unknown (titer<400)               |                   |                         | +             | no sequence              | no sequence  | ND          | unknown / unknown                 |

| Severity | Presumptive serogroup (serum) [a] | blood culture [b] | Serogroup (culture) [c] | blood DNA [b] | species (rrs)            | genotype [d] | MLVA [e]    | Presumptive serogroup/serovar [f] |
|----------|-----------------------------------|-------------------|-------------------------|---------------|--------------------------|--------------|-------------|-----------------------------------|
| 0        | unknown (titer<400)               |                   |                         | +             | <i>L. noguchii</i>       | E            | ND          | Australis / Bajan                 |
| 0        | unknown (co-agglutination)        |                   |                         | +             | <i>L. interrogans</i>    | no sequence  | ND          | unknown / unknown                 |
| 0        | unknown (titer<400)               |                   |                         | +             | <i>L. borgpetersenii</i> | C            | ND          | Ballum / Arborea                  |
| 0        | unknown (co-agglutination)        |                   |                         | +             | <i>L. kirschneri</i>     | B            | 380/560/0   | Ictero / Bogvere                  |
| 0        | unknown (titer<400)               |                   |                         | +             | no sequence              | no sequence  | ND          | unknown / unknown                 |
| 0        | unknown (titer<400)               |                   |                         | +             | <i>L. santarosai</i>     | no sequence  | ND          | unknown / unknown                 |
| 0        | Ballum                            |                   |                         | +             | <i>L. borgpetersenii</i> | C            | ND          | Ballum / Arborea                  |
| 0        | unknown (titer<400)               |                   |                         | +             | <i>L. kmetyi</i>         | no sequence  | ND          | unknown / unknown                 |
| 0        | unknown (titer<400)               |                   |                         | +             | <i>L. santarosai</i>     | I            | ND          | Celledoni / unknown               |
| 0        | Icterohaemorrhagiae               | +                 | Ballum                  | +             | <i>L. borgpetersenii</i> | C            | ND          | Ballum / Arborea                  |
| 0        | Icterohaemorrhagiae               | +                 | Ictero                  | +             | <i>L. kirschneri</i>     | B            | 380/560/0   | Ictero / Bogvere                  |
| 0        | unknown (co-agglutination)        |                   |                         | +             | <i>L. borgpetersenii</i> | C            | ND          | Ballum / Arborea                  |
| 0        | Celledoni                         |                   |                         | +             | <i>L. santarosai</i>     | I            | ND          | Celledoni / unknown               |
| 0        | Cynopteri                         |                   |                         | +             | <i>L. borgpetersenii</i> | D            | ND          | Tarassovi / unknown               |
| 0        | Icterohaemorrhagiae               | +                 | Ictero                  | +             | <i>L. interrogans</i>    | A            | 500/350/750 | Ictero / Ictero                   |
| 0        | unknown (titer<400)               |                   |                         | +             | <i>L. kirschneri</i>     | no sequence  | ND          | unknown / unknown                 |
| 0        | unknown (titer<400)               | +                 | Mini                    | +             | <i>L. santarosai</i>     | J            | ND          | unknown / unknown                 |
| 0        | Tarassovi                         |                   |                         | +             | <i>L. santarosai</i>     | no sequence  | ND          | unknown / unknown                 |
| 0        | unknown (titer<400)               |                   |                         | +             | <i>L. santarosai</i>     | H            | ND          | unknown / unknown                 |
| 0        | unknown (titer<400)               |                   |                         | +             | <i>L. borgpetersenii</i> | C            | ND          | Ballum / Arborea                  |
| 0        | unknown (titer<400)               |                   |                         | +             | <i>L. kirschneri</i>     | no sequence  | ND          | unknown / unknown                 |
| 0        | unknown (co-agglutination)        |                   |                         | +             | <i>L. interrogans</i>    | no sequence  | ND          | unknown / unknown                 |
| 0        | unknown (titer<400)               |                   |                         | +             | <i>L. santarosai</i>     | no sequence  | ND          | unknown / unknown                 |
| 0        | Sejroe                            |                   |                         | +             | no sequence              | no sequence  | ND          | unknown / unknown                 |
| 0        | Icterohaemorrhagiae               |                   |                         | +             | no sequence              | no sequence  | ND          | Ictero / unknown                  |
| 0        | Icterohaemorrhagiae               | +                 | Ictero                  | +             | <i>L. kirschneri</i>     | B            | 380/560/0   | Ictero / Bogvere                  |
| 0        | Icterohaemorrhagiae               |                   |                         | +             | <i>L. kirschneri</i>     | no sequence  | ND          | Ictero / Bogvere                  |
| 0        | Icterohaemorrhagiae               |                   |                         | +             | <i>L. kirschneri</i>     | B            | 380/560/0   | Ictero / Bogvere                  |
| 0        | unknown (titer<400)               |                   |                         | +             | <i>L. santarosai</i>     | I            | ND          | Celledoni / unknown               |
| 0        | unknown (titer<400)               | +                 | Ictero                  | +             | <i>L. interrogans</i>    | A            | 500/350/750 | Ictero / Ictero                   |
| 0        | Icterohaemorrhagiae               |                   |                         | +             | <i>L. santarosai</i>     | J            | ND          | unknown / unknown                 |
| 0        | Celledoni                         |                   |                         | +             | <i>L. santarosai</i>     | I            | ND          | Celledoni / unknown               |
| 0        | unknown (titer<400)               | +                 | unknown                 | +             | <i>L. santarosai</i>     | J            | ND          | unknown / unknown                 |
| 0        | unknown (titer<400)               |                   |                         | +             | <i>L. santarosai</i>     | H            | ND          | unknown / unknown                 |
| 0        | unknown (titer<400)               | +                 | unknown                 | +             | <i>L. santarosai</i>     | H            | ND          | unknown / unknown                 |
| 0        | Tarassovi                         |                   |                         | +             | <i>L. borgpetersenii</i> | D            | ND          | Tarassovi / unknown               |
| 0        | Australis                         |                   |                         | +             | <i>L. noguchii</i>       | no sequence  | ND          | Australis / Bajan                 |
| 0        | Tarassovi                         |                   |                         | +             | <i>L. borgpetersenii</i> | no sequence  | ND          | Tarassovi / unknown               |
| 0        | Icterohaemorrhagiae               | +                 | Ictero                  | +             | <i>L. interrogans</i>    | A            | 500/350/750 | Ictero / Ictero                   |
| 0        | Hebdomadis                        | +                 | Tarassovi               | +             | <i>L. borgpetersenii</i> | D            | ND          | Tarassovi / unknown               |
| 0        | Icterohaemorrhagiae               |                   |                         | +             | no sequence              | no sequence  | ND          | Ictero / unknown                  |
| 0        | unknown (titer<400)               |                   |                         | +             | no sequence              | no sequence  | ND          | unknown / unknown                 |
| 0        | Sarmin                            |                   |                         | +             | <i>L. kirschneri</i>     | no sequence  | ND          | unknown / unknown                 |
| 0        | Icterohaemorrhagiae               |                   |                         | +             | no sequence              | no sequence  | ND          | Ictero / unknown                  |
| 0        | Ballum                            | +                 | Celledoni               | +             | <i>L. santarosai</i>     | I            | ND          | Celledoni / unknown               |
| 0        | Icterohaemorrhagiae               |                   |                         | +             | no sequence              | no sequence  | ND          | Ictero / unknown                  |
| 0        | Icterohaemorrhagiae               |                   |                         | +             | no sequence              | no sequence  | ND          | Ictero / unknown                  |

| Severity | Presumptive serogroup (serum) [a] | blood culture [b] | Serogroup (culture) [c] | blood DNA [b] | species (rrs)            | genotype [d] | MLVA [e]    | Presumptive serogroup/serovar [f] |
|----------|-----------------------------------|-------------------|-------------------------|---------------|--------------------------|--------------|-------------|-----------------------------------|
| 0        | unknown (co-agglutination)        | +                 | Celledoni               | +             | <i>L. santarosai</i>     | I            | ND          | Celledoni / unknown               |
| 0        | unknown (co-agglutination)        |                   |                         | +             | <i>L. interrogans</i>    | no sequence  | 500/350/750 | Ictero / Ictero                   |
| 0        | unknown (negative)                |                   |                         | +             | <i>L. kmetyi</i>         | no sequence  | ND          | unknown / unknown                 |
| 0        | Louisiana                         |                   |                         | +             | <i>L. kirschneri</i>     | no sequence  | ND          | unknown / unknown                 |
| 0        | Icterohaemorrhagiae               |                   |                         | +             | <i>L. kirschneri</i>     | no sequence  | ND          | Ictero / Bogvere                  |
| 0        | Icterohaemorrhagiae               |                   |                         | +             | <i>L. borgpetersenii</i> | D            | ND          | Tarassovi / unknown               |
| 0        | unknown (co-agglutination)        | +                 | Ictero                  | +             | <i>L. kirschneri</i>     | no sequence  | ND          | Ictero / Bogvere                  |
| 0        | unknown (co-agglutination)        |                   |                         | +             | <i>L. noguchii</i>       | E            | ND          | Australis / Bajan                 |
| 0        | Cynopteri                         |                   |                         | +             | <i>L. interrogans</i>    | A            | 500/350/750 | Ictero / Ictero                   |
| 0        | unknown (titer<400)               |                   |                         | +             | <i>L. borgpetersenii</i> | C            | ND          | Ballum / Arborea                  |
| 0        | Canicola                          |                   |                         | +             | no sequence              | no sequence  | ND          | unknown / unknown                 |
| 0        | Icterohaemorrhagiae               |                   |                         | +             | no sequence              | no sequence  | ND          | Ictero / unknown                  |
| 0        | Louisiana                         | +                 | Celledoni               | +             | <i>L. santarosai</i>     | I            | ND          | Celledoni / unknown               |
| 0        | Canicola                          |                   |                         | +             | <i>L. borgpetersenii</i> | C            | ND          | Ballum / Arborea                  |
| 0        | Ballum                            |                   |                         | +             | <i>L. borgpetersenii</i> | C            | ND          | Ballum / Arborea                  |
| 0        | Icterohaemorrhagiae               |                   |                         | +             | no sequence              | no sequence  | ND          | Ictero / unknown                  |
| 0        | unknown (co-agglutination)        | +                 | Celledoni               | +             | <i>L. santarosai</i>     | I            | ND          | Celledoni / unknown               |
| 0        | Icterohaemorrhagiae               |                   |                         | +             | <i>L. interrogans</i>    | A            | ND          | Ictero / Ictero                   |
| 0        | unknown (negative)                |                   |                         | +             | no sequence              | no sequence  | ND          | unknown / unknown                 |
| 0        | Icterohaemorrhagiae               |                   |                         | +             | no sequence              | no sequence  | ND          | Ictero / unknown                  |
| 0        | unknown (co-agglutination)        |                   |                         | +             | <i>L. interrogans</i>    | A            | 500/350/750 | Ictero / Ictero                   |
| 0        | Icterohaemorrhagiae               |                   |                         | +             | <i>L. kirschneri</i>     | no sequence  | ND          | Ictero / Bogvere                  |

**a:** Serogroup was determined by MAT on serum samples (two sampling made >1week apart). High titers (>=400) of the serum with one particular antigen were used to identify the presumptive serogroup of the infecting bacterium.

**b:** PCR- and culture positive samples

**c:** Serogrouping of isolates by MAT with rabbit antisera against reference serovars of the main serogroups (Australis, Autumnalis, Bataviae, Canicola, Ballum, Cynopteri, Grippityphosa, Sejroe, Hebdomadis, Icterohaemorrhagiae, Panama, Semarang, Pomona, Pyrogenes, Tarassovi, Celledoni, Djamisan, Mini, Sarmin, Shermani, Javanica, and Louisiana)

**d:** genotype determined by sequencing of secY (see Bourhy et al. 2013)

**e:** size in bp of the PCR products for VNTR4, VNTR7, and VNTR10 (see Salaun et al. 2006)

**f:** When culture isolates are available, we can perform serogrouping and molecular typing, including PFGE. In most cases, the identification of the serogroup and the PFGE profile enables the identification at the serovar level, except when no agglutination was obtained (the serogroup cannot be determined) or when the PFGE profile does not correspond to any reference serovar. When isolates are not available, the serovar can be determined by molecular typing methods on biological samples: an identical secY sequence and MLVA profile with a known *Leptospira* serovar circulating in the Caribbean islands enable the identification of the presumptive serovar directly from the biological sample.

Ictero: Icterohaemorrhagiae; for the serovar, Ictero can correspond to either serovar Icterohaemorrhagiae or Copenhageni

ND: Not Done.
